# Supplementary material for: The evolution of metabolic networks of E. coli
Source: Springer Nature journal article supplement (doi:10.1186/1752-0509-5-182), 2011-01-01
Supplement: 12918_2011_783_MOESM17_ESM.pdf [file 12918_2011_783_MOESM17_ESM.pdf]

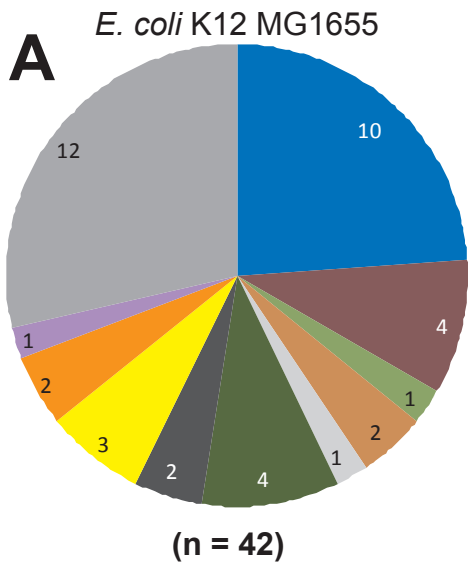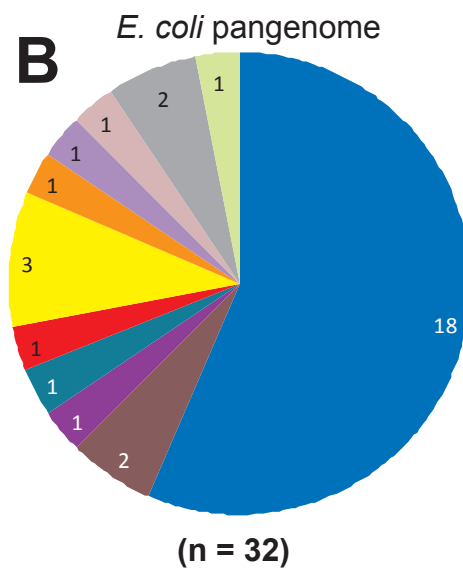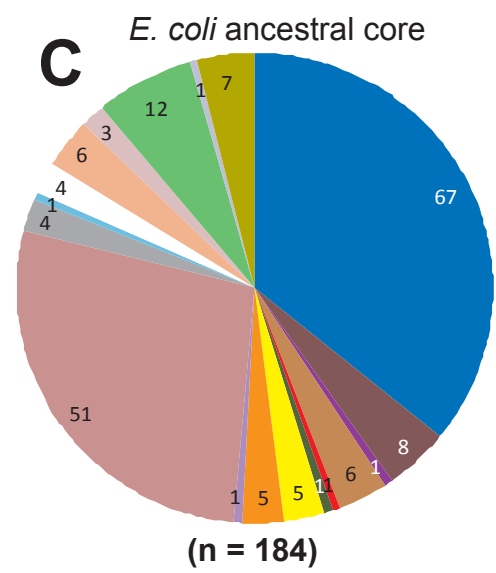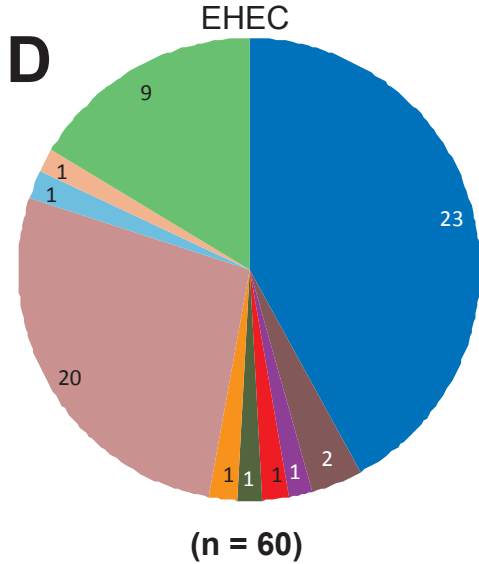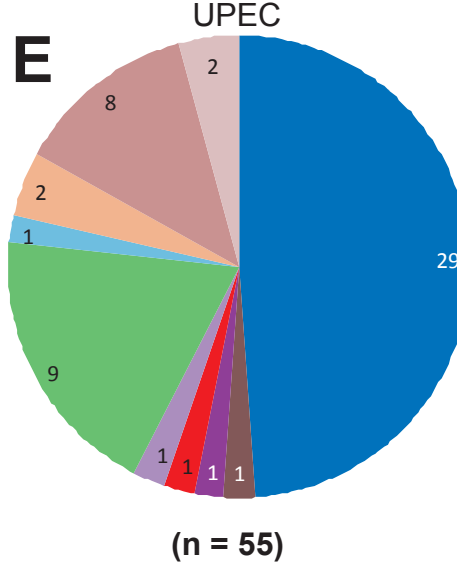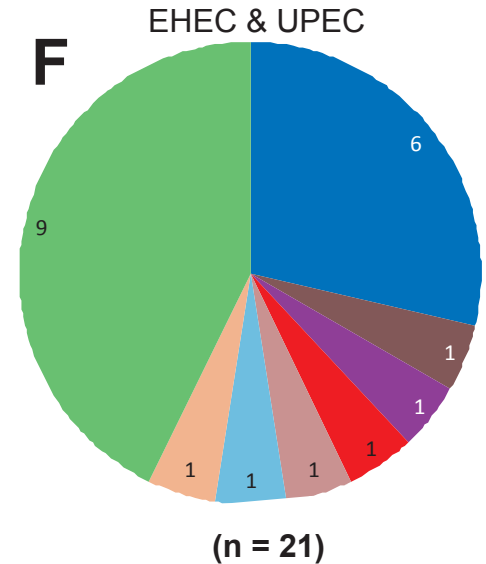

( ) Alternate carbon metabolism  
 ( ) Amino acid metabolism  
 ( ) Carnitine degradation  
 ( ) Cell envelope biosynthesis  
 ( ) Citric acid cycle  
 ( ) Cofactor and prosthetic group biosynthesis  
 ( ) Glycerophospholipid metabolism  
 ( ) Glycine betaine biosynthesis  
 ( ) Inorganic ion transport and metabolism  
 ( ) Lipopolysaccharide biosynthesis/recycling  
 ( ) Membrane lipid metabolism

( ) Menaquinone biosynthesis  
 ( ) Murein metabolism  
 ( ) Nitrogen metabolism  
 ( ) Oxidative phosphorylation  
 ( ) Purine and pyrimidine metabolism  
 ( ) Pyruvate metabolism  
 ( ) Transport inner membrane  
 ( ) Transport outer membrane  
 ( ) Unassigned  
 ( ) Urea degradation  
 ( ) tRNA charging
