# Supplementary material for: The evolution of metabolic networks of E. coli
Source: Springer Nature journal article supplement (doi:10.1186/1752-0509-5-182), 2011-01-01

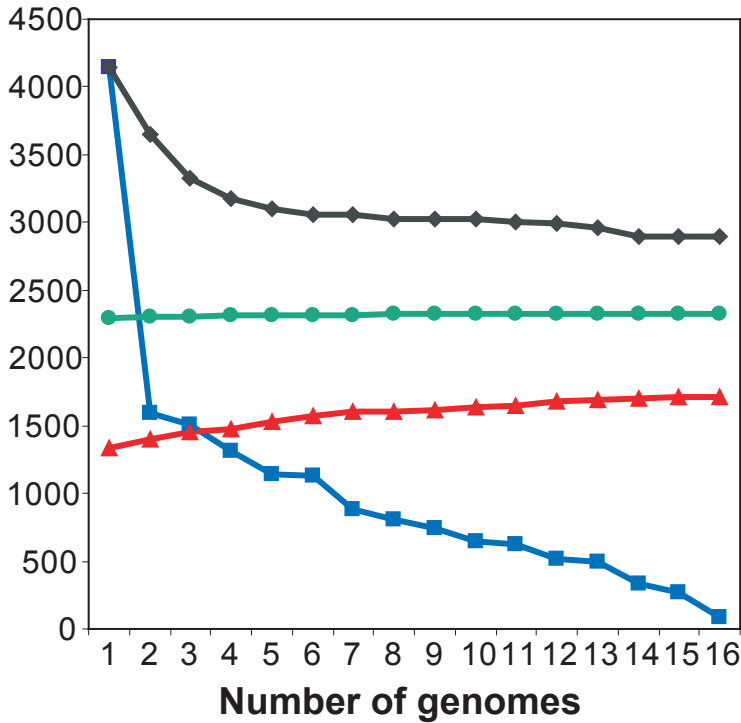

Supplement: 12918_2011_783_MOESM18_ESM.pdf [file 12918_2011_783_MOESM18_ESM.pdf]
