# Supplementary material for: The evolution of metabolic networks of E. coli
Source: Springer Nature journal article supplement (doi:10.1186/1752-0509-5-182), 2011-01-01

***E. coli* K12 strains**  
(Eco1339\_MG1655  
& Eco1335\_W3110)  
2,428 reactions

21 RXN deletions

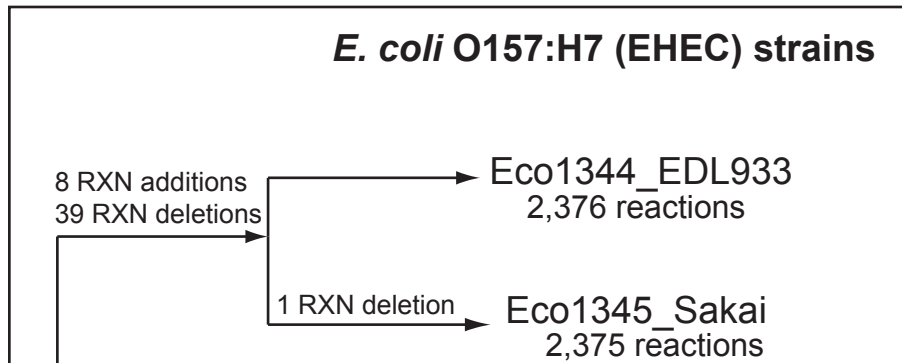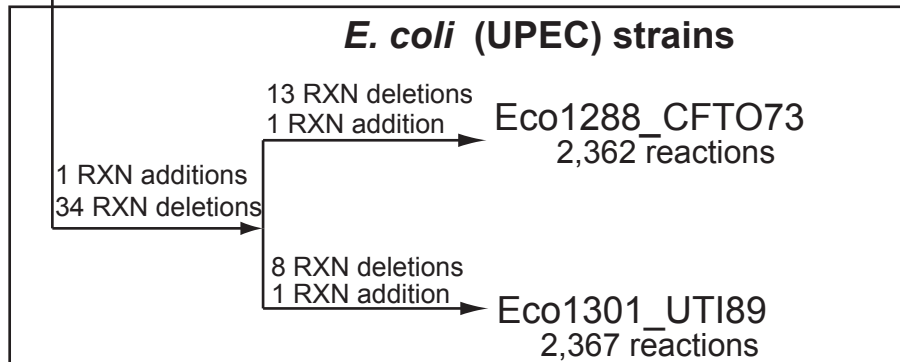

Supplement: 12918_2011_783_MOESM19_ESM.pdf [file 12918_2011_783_MOESM19_ESM.pdf]
