# Supplementary material for: The evolution of metabolic networks of E. coli
Source: Springer Nature journal article supplement (doi:10.1186/1752-0509-5-182), 2011-01-01

**A****Aerobic**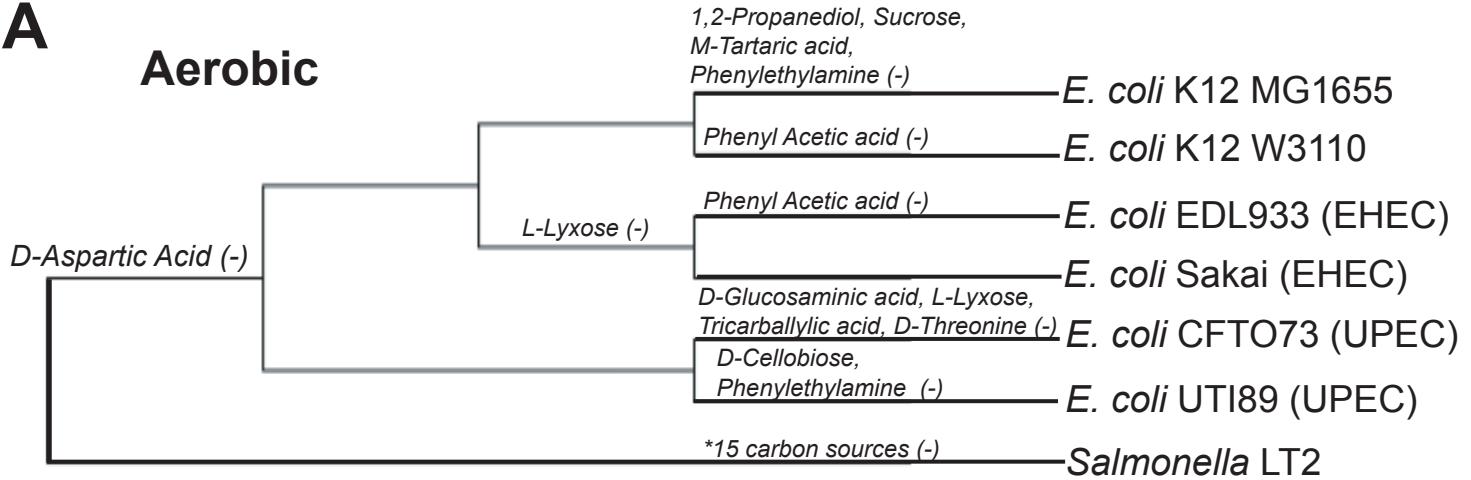

\*15 carbon sources = 1,2-Propanediol, D-Lactose, Lactulose, Sucrose, Glutaric Acid-Lactone, Adonitol, Glycolic Acid, D-Cellulose, Acetoacetic Acid, D-Malic Acid, D-Psicose, L-Galactonic Acid-?-Lactone, D-Galacturonic Acid, Phenylethylamine, 2-Aminoethanol (-)

**B****Anaerobic**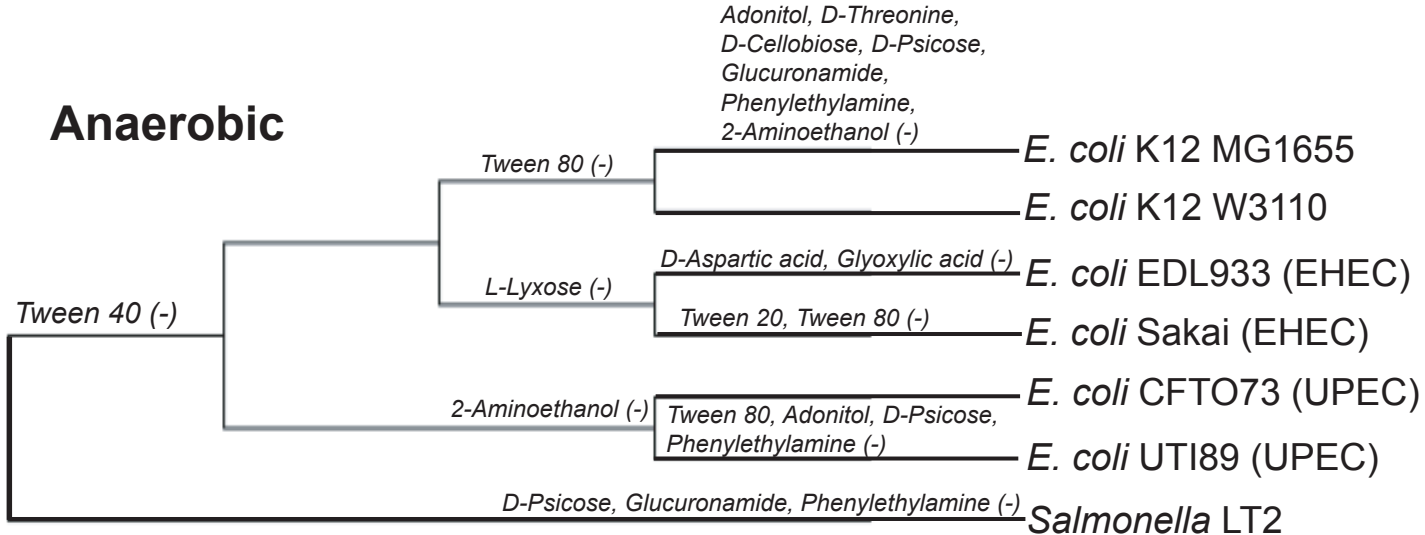

Supplement: 12918_2011_783_MOESM20_ESM.pdf [file 12918_2011_783_MOESM20_ESM.pdf]
