# Supplementary material for: The evolution of metabolic networks of E. coli
Source: Springer Nature journal article supplement (doi:10.1186/1752-0509-5-182), 2011-01-01
Supplement: 12918_2011_783_MOESM21_ESM.pdf [file 12918_2011_783_MOESM21_ESM.pdf]

*E. coli* or *Salmonella* strain

|                  | MG1655<br>W3110<br>EDL933<br>Sakai<br>CFTO73<br>UTI89<br>LT2 | MG1655<br>W3110<br>EDL933<br>Sakai<br>CFTO73<br>UTI89<br>LT2 | Carbon source               |
|------------------|--------------------------------------------------------------|--------------------------------------------------------------|-----------------------------|
| <b>Aerobic</b>   |                                                              |                                                              | Formic acid                 |
|                  |                                                              |                                                              | L-Fucose                    |
|                  |                                                              |                                                              | D-Melibiose                 |
|                  |                                                              |                                                              | D-Aspartic acid             |
|                  |                                                              |                                                              | 1,2-Propanediol             |
|                  |                                                              |                                                              | $\alpha$ -Keto-Butyric acid |
|                  |                                                              |                                                              | Sucrose                     |
|                  |                                                              |                                                              | M-Tartaric acid             |
|                  |                                                              |                                                              | M-Inositol                  |
|                  |                                                              |                                                              | D-Threonine                 |
|                  |                                                              |                                                              | Glycolic acid               |
|                  |                                                              |                                                              | Acetoacetic acid            |
|                  |                                                              |                                                              | Tyramine                    |
|                  |                                                              |                                                              | L-Lyxose                    |
|                  |                                                              |                                                              | D-Galacturonic acid         |
|                  |                                                              |                                                              | Phenylethylamine            |
| <b>Anaerobic</b> |                                                              |                                                              | Succinic acid               |
|                  |                                                              |                                                              | L-Proline                   |
|                  |                                                              |                                                              | Formic acid                 |
|                  |                                                              |                                                              | L-Fucose                    |
|                  |                                                              |                                                              | Acetic acid                 |
|                  |                                                              |                                                              | D-Melibiose                 |
|                  |                                                              |                                                              | D-Aspartic acid             |
|                  |                                                              |                                                              | 1,2-Propanediol             |
|                  |                                                              |                                                              | $\alpha$ -Keto-Butyric acid |
|                  |                                                              |                                                              | M-Inositol                  |
|                  |                                                              |                                                              | D-Threonine                 |
|                  |                                                              |                                                              | Propionic acid              |
|                  |                                                              |                                                              | Glycolic acid               |
|                  |                                                              |                                                              | L-Threonine                 |
|                  |                                                              |                                                              | Acetoacetic acid            |
|                  |                                                              |                                                              | Tyramine                    |
|                  |                                                              | L-Lyxose                                                     |                             |
|                  |                                                              | D-Galacturonic acid                                          |                             |
|                  |                                                              | Phenylethylamine                                             |                             |
| <b>Max Z=</b>    | $V_{\text{Biomass}}$                                         | $V_{\text{RESP1}} + V_{\text{RESP2}}$                        |                             |

- = False negative (*in silico* =N experimental =Y)
- = False positive (*in silico* =Y experimental =N)
- = In agreement
- = Metabolite not included in metabolic model
