# Supplementary material for: The evolution of metabolic networks of E. coli
Source: Springer Nature journal article supplement (doi:10.1186/1752-0509-5-182), 2011-01-01
Supplement: 12918_2011_783_MOESM22_ESM.pdf [file 12918_2011_783_MOESM22_ESM.pdf]

**A**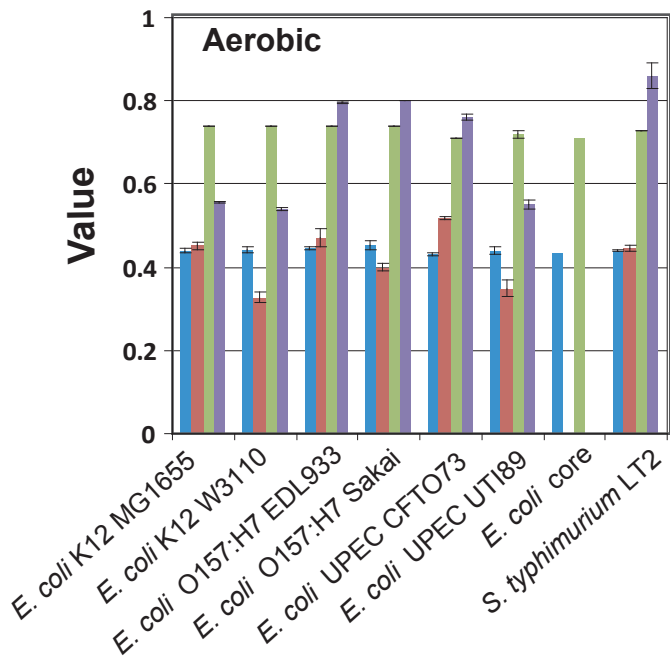**B**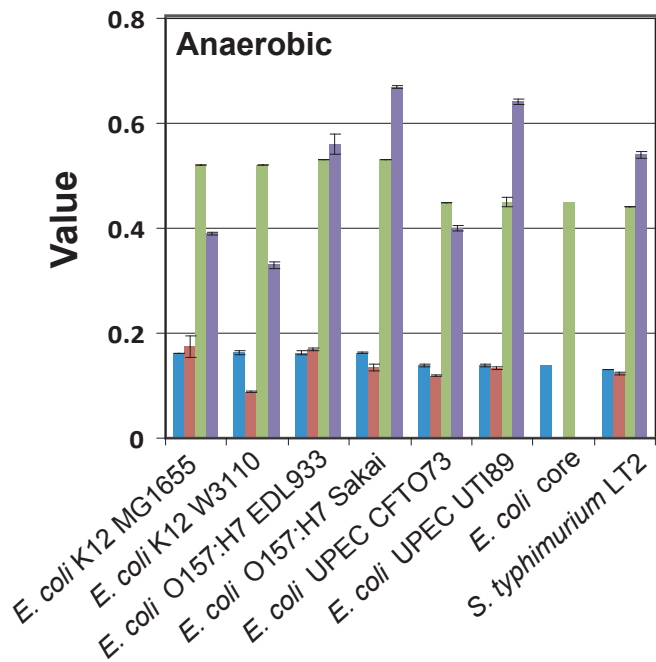

■ =  $Y_{in\ silico}$  growth yield (gDW/g)

■ =  $Y_{experimental}$  growth yield (gDW/g)

■ =  $\mu_{in\ silico}$  growth rate (1/h)

■ =  $\mu_{experimental}$  growth rate (1/h)
