# Supplementary material for: The evolution of metabolic networks of E. coli
Source: Springer Nature journal article supplement (doi:10.1186/1752-0509-5-182), 2011-01-01
Supplement: 12918_2011_783_MOESM23_ESM.pdf [file 12918_2011_783_MOESM23_ESM.pdf]

**A****Aerobic**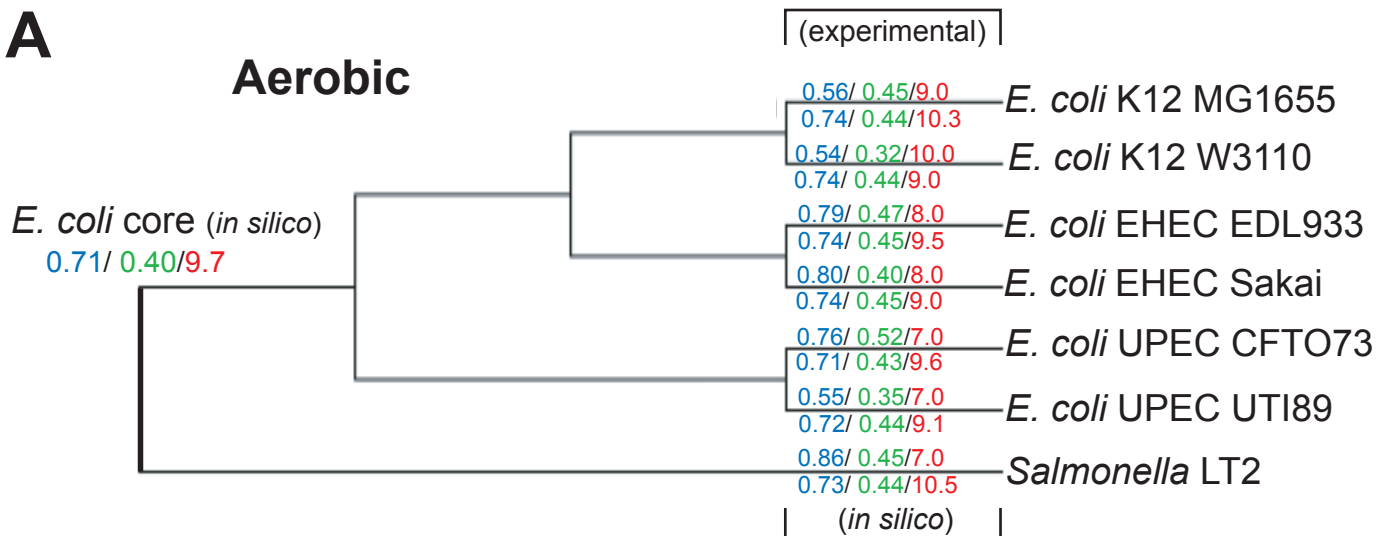**B****Anaerobic**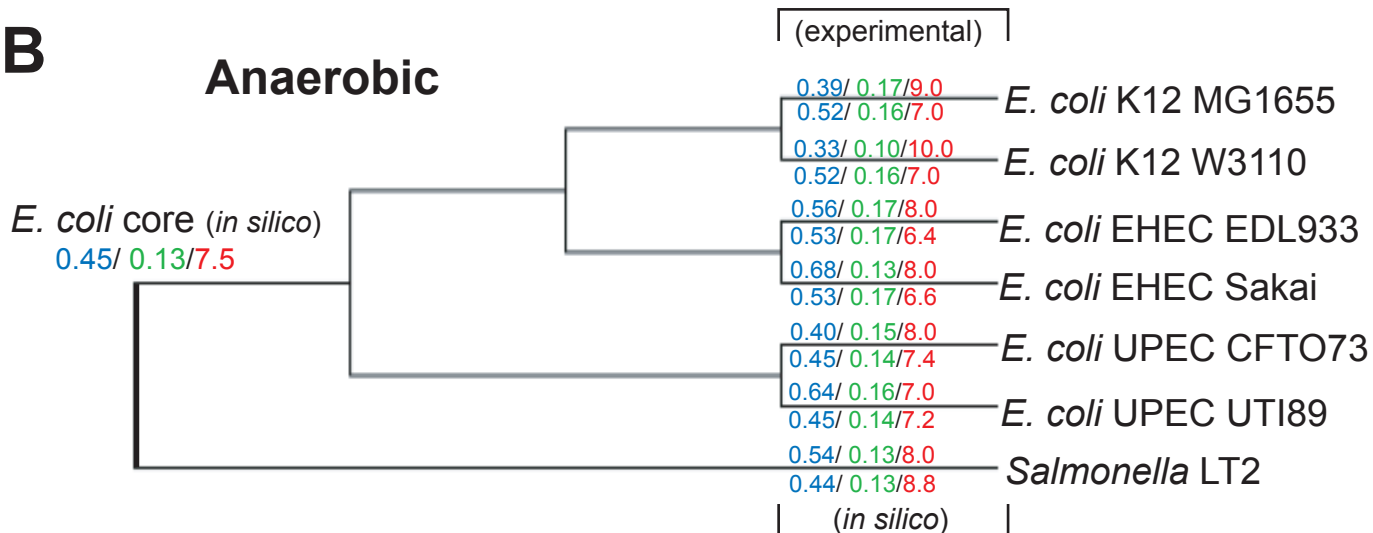

Growth rate (1/h)

Growth yield (g)

Time to attain final biomass (h)

(experimental)

(*in silico*)
